# Supplementary material for: Electrostatically driven self-assembly of CdTe nanoparticles with organic chromophores probed via Ham effect
Source: Royal Society of Chemistry journal article supplement (doi:10.1039/c5ra08334f), 2015-01-01
Supplement: c5ra08334f1.pdf [file c5ra08334f1.pdf]

## Supporting Information

### Electrostatically Driven Self-Assembly of CdTe Nanoparticles with Organic Chromophores Probed via Ham Effect

Arun Gopi<sup>a,b</sup>, Asarikal Vindhyasarumi<sup>a</sup> and Karuvath Yoosaf<sup>a,b\*</sup>

<sup>a</sup> Photosciences and Photonics, Chemical Sciences and Technology Division, CSIR-National Institute for Interdisciplinary Science and Technology, Thiruvananthapuram 695 019, Kerala, India email: [yoosafk@niist.res.in](mailto:yoosafk@niist.res.in). <sup>b</sup> Academy of Scientific and Innovative Research (AcSIR), New Delhi 110001, India.

#### 1. DLS & Zeta Measurements of CdTe QDs

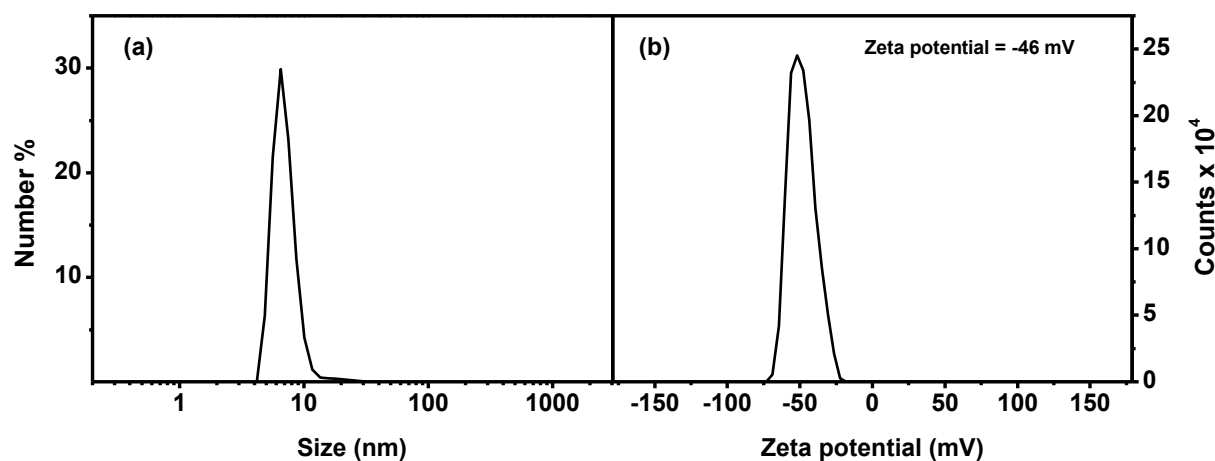

**Figure S1.** DLS data showing (a) size distribution curve and (b) zeta potential curve for CdTe@TGA nanoparticles

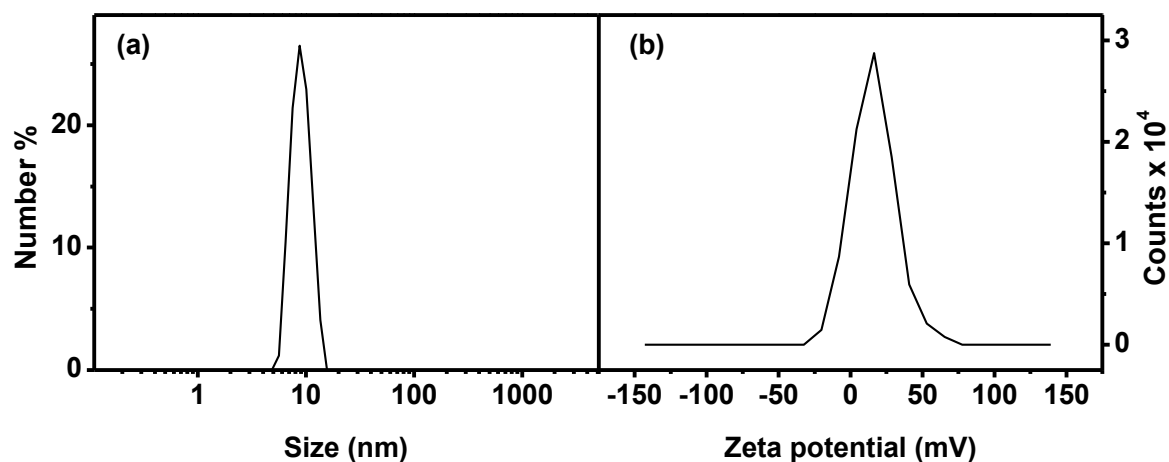

**Figure S2.** DLS data showing (a) Size distribution curve and (b) zeta potential curve for CdTe@Cyst nanoparticles

## 2. Emission spectra of PMAH in water and cyclohexane

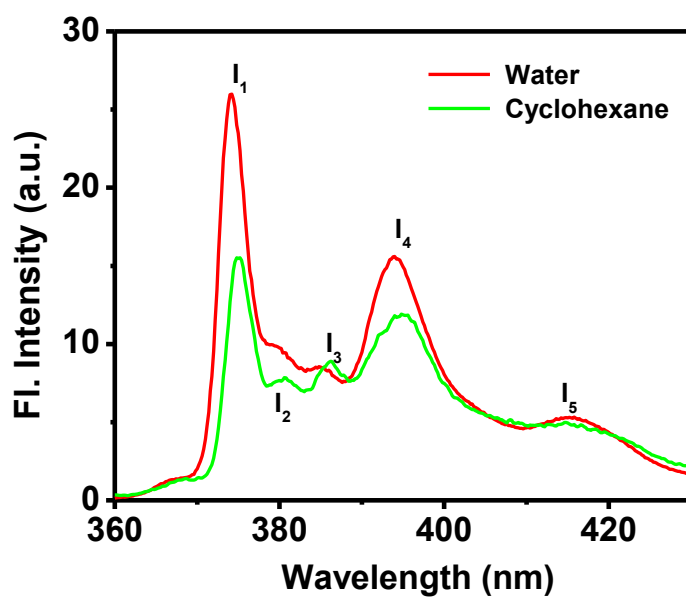

**Figure S3.** Emission spectra of PMAH in water (red) and cyclohexane (green) recorded after exciting at 340 nm. The  $I_3/I_1$  values were estimated to 0.33 and 0.58 respectively in water and cyclohexane.

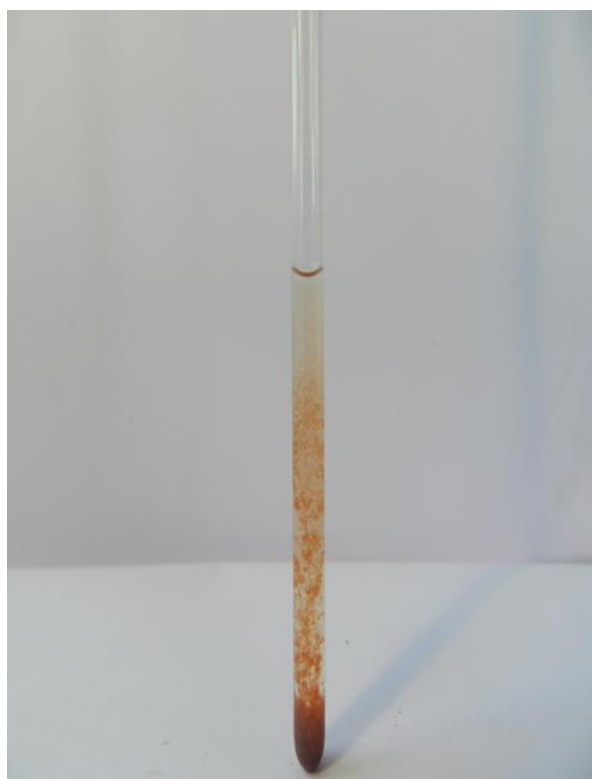

**Figure S4.** Photograph of the NMR tube showing the formation of precipitates when CdTe@TGA and PMAH were mixed in millimolar concentrations.

### 3. Absorption spectra of TGA in water

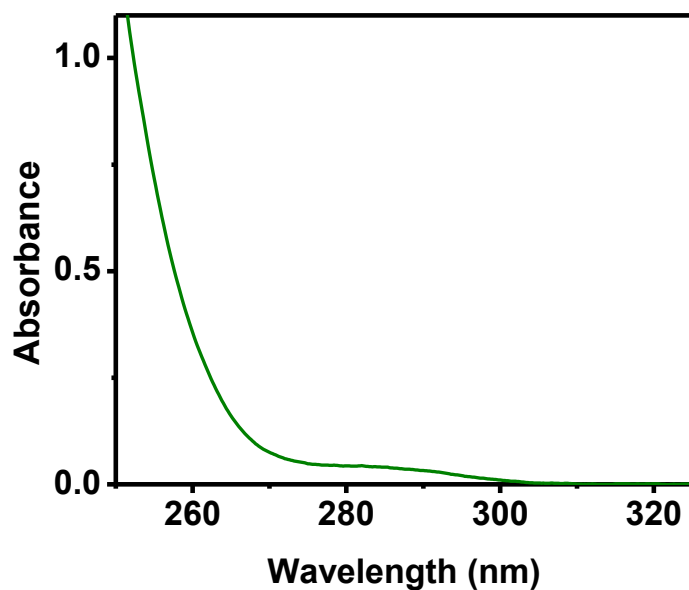

**Figure S5.** Absorption spectrum of 3 mM thioglycolic acid (TGA) in water.

### 4. Absorption spectra of PMAH in presence of CdTe@TGA QDs

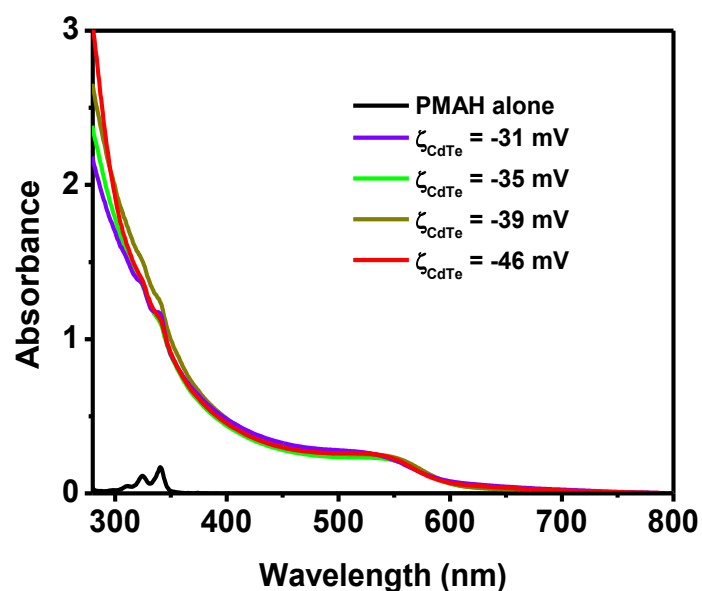

**Figure S6.** Absorption spectra of 2.5 μM PMAH in presence of CdTe@TGA nanoparticles having different surface charges and same optical density.

## 5. Interaction of positively charge CdTe QDs with pyrene chromophores

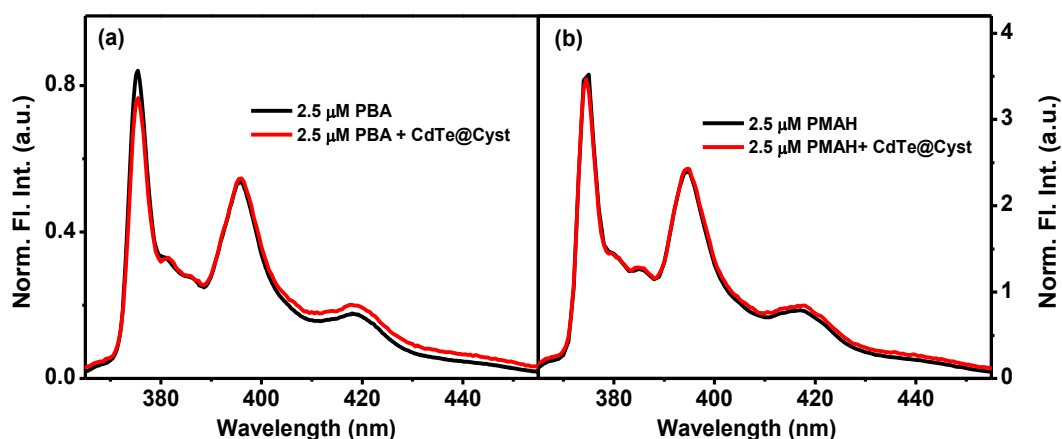

**Figure S7.** (a) Normalized fluorescence spectrum of 2.5  $\mu\text{M}$  pyrene butyric acid in the absence (black) and presence (red) of cysteamine capped CdTe nanoparticles. (b) Normalized fluorescence spectrum of 2.5  $\mu\text{M}$  PMAH in the absence (black) and presence (red) of cysteamine capped CdTe nanoparticles

## 6. Morphological Characterization of Nano hybrids

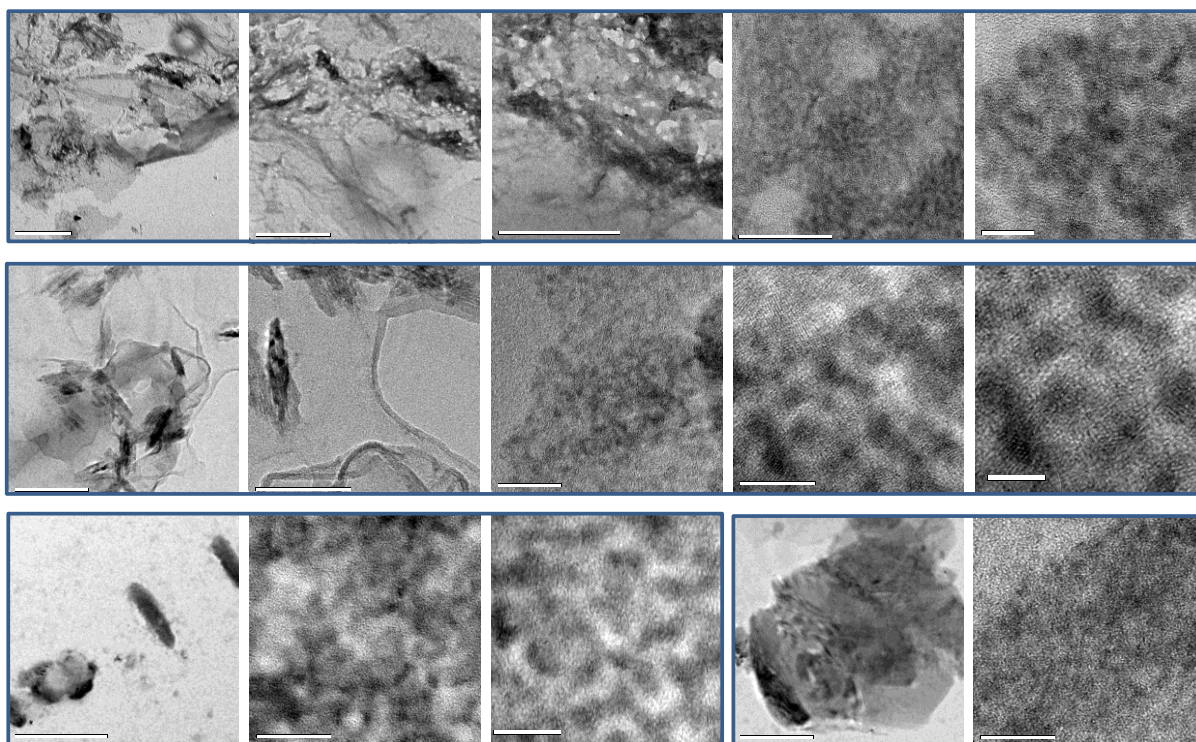

**Figure S8.** Typical TEM micrographs of various types of sheet like morphologies observed for CdTe@TGA:PMAH Nanohybrids; the higher magnifications images shows that these superstructures are composed of nonfused CdTe nanocrystals.

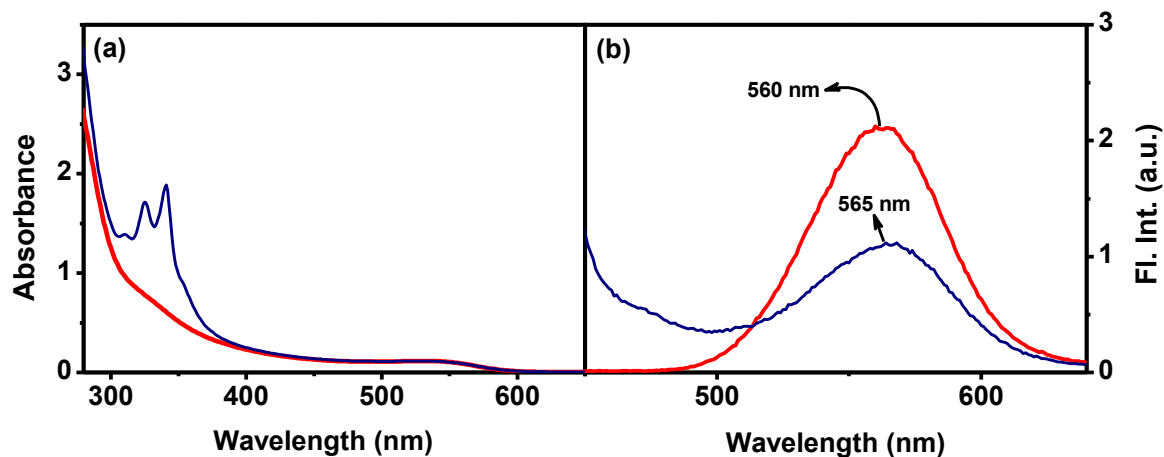

**Figure S9.** (a) Absorption and Emission spectra of CdTe@TGA nanoparticles in the absence (red) and presence of 30  $\mu\text{M}$  PMAH.

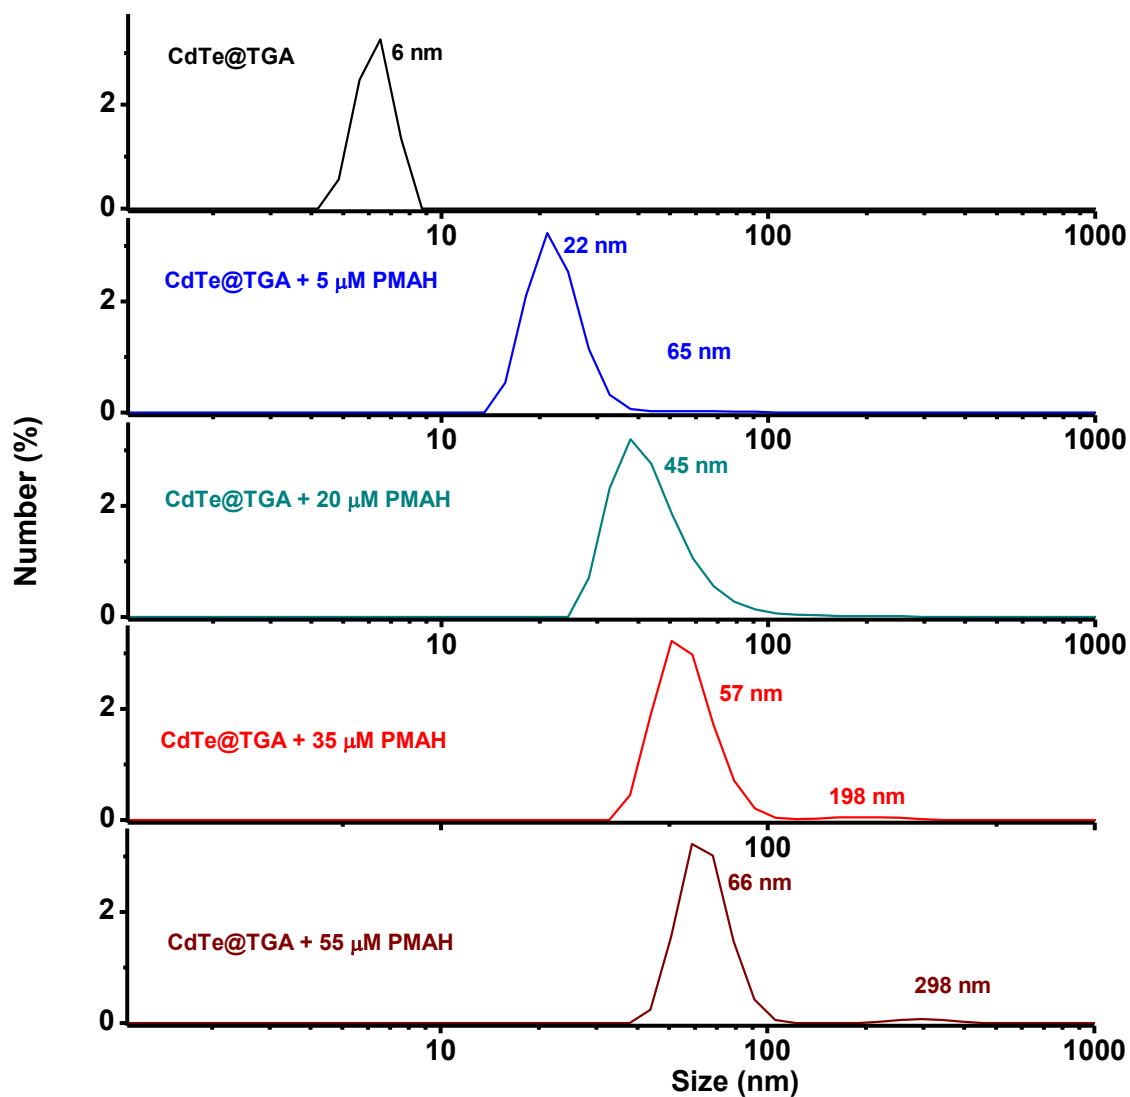

**Figure S10.** DLS data showing the variation of the size of the agglomerates in presence of increasing concentrations of PMAH
